# Supplementary material for: Ambient air quality and the risk for Chronic Obstructive Pulmonary Disease among Metro Manila Development Authority traffic enforcers in Metro Manila: An exploratory study
Source: PubMed Central journal article supplement — Chronic Dis Transl Med. 2021 Feb 23;7(2):117–24. doi: 10.1016/j.cdtm.2021.01.002 (PMC8180521; doi:10.1016/j.cdtm.2021.01.002), 2021-02-23
Supplement: mmc1.pdf [file mmc1.pdf]

**Table S1. Primary Variables Used in the Study**

| Variable                  | Name                                       | Unit                     | Definition                                                                                                                   | Type        | Source of Information |
|---------------------------|--------------------------------------------|--------------------------|------------------------------------------------------------------------------------------------------------------------------|-------------|-----------------------|
| Independent Variable (IV) | Exposure Month Index                       | PPM 2.5 per month        | Exposure Month Index = average monthly exposure to PM 2.5 levels in PPM/number of months deployment in an active sensor area | Ratio       | DENR                  |
| Dependent Variable (DV)   | Spirometry Findings                        | FEV1/FVC Ratio           | Results from spirometry                                                                                                      | Ratio       | Spirometry            |
|                           | IPAG Risk Score                            | 0-38 points              | IPAG questionnaire risk assessment score                                                                                     | Ratio       | Questionnaire         |
| Confounding Variables     | Age                                        | Years                    | Years alive since birth                                                                                                      | Ratio       | Questionnaire         |
|                           | Sex                                        | Male/Female              | Biological assignment at birth                                                                                               | Nominal     | Questionnaire         |
|                           | Obesity                                    | kg/m <sup>2</sup>        | Body Mass Index (BMI)                                                                                                        | Ratio       | Questionnaire         |
|                           | Smoking History                            | Number of sticks per day | Tobacco cigarette sticks per day                                                                                             | Categorical | Questionnaire         |
|                           | History of Respiratory Disease             | Yes/No                   | Positive medical and/or family history of respiratory disease                                                                | Categorical | Questionnaire         |
|                           | Indoor Air Pollution                       | Yes/No                   | Method of cooking (i.e. inside, electric/wood/gas) and/or lack of ventilation                                                | Categorical | Questionnaire         |
|                           | Use of Personal Protective Equipment (PPE) | Yes/No                   | Use of face masks during work shifts                                                                                         | Categorical | Questionnaire         |
|                           | Years of Service under the MMDA            | Years                    | Years of working in the field as a traffic enforcer                                                                          | Nominal     | Questionnaire         |

Table S2. PM<sub>2.5</sub> yearly average

| Sensor # | Location                                                                                  | 2016  | 2017  | 2018   |
|----------|-------------------------------------------------------------------------------------------|-------|-------|--------|
| 1        | DLSU, 2401 Taft Ave.                                                                      | 31.83 | 27.19 | -      |
| 2        | DPWH EDSA NIA Road                                                                        | 43.81 | 50.03 | -      |
| 3        | Pamantasan ng Lungsod ng Valenzuela, Valenzuela City                                      | 31.88 | 33.62 | -      |
| 4        | Rohm and Hass Property, Las Pinas City                                                    | 22.8  | 22.23 | 91.41  |
| 5        | Makati Park, Jp Rizal Ext., East Rembo, Makati City                                       | -     | 27.87 | -      |
| 6        | Hardin ng Pagasa, Mandaluyong City Hall, Plainview, Mandaluyong City                      | 42.08 | 50.03 | 41.02  |
| 7        | Parking Area of Marikina Justice Hall, Marikina City                                      | 33.7  | 29.05 | -      |
| 8        | Hospital ng Muntinlupa Cpd., Civic Dr., Filinvest Ave, Corporate City, Alabang Muntinlupa | 17.31 | 23.28 | 20.11  |
| 9        | Navotas City Hall, M. Naval St., Navotas City                                             | 50.91 | 53.67 | 49.72  |
| 10       | North Caloocan City Hall - Zapote St., Caloocan City                                      | 41.39 | 39.41 | 150.25 |
| 11       | Don Bosco Barangay Hall, Better Living subd., Paranaque City                              | 24.58 | 30.43 | 22.11  |
| 12       | Andrews Ave., Pasay                                                                       | 27.19 | 38.82 | -      |
| 13       | Brgy. Oranbo, Pasig                                                                       | 36.32 | 31.01 | 23.49  |
| 14       | Pateros Elementary School, Pateros                                                        | 31.05 | 30.96 | 29.3   |
| 15       | Pinaglabanan Shrine, San Juan City                                                        | 44.58 | 24.21 | 24.69  |
| 16       | Technological University of the Philippines - Taguig Campus, Taguig City                  | 25.05 | 27.63 | -      |
| 17       | UE Caloocan Campus, Samson Roas, Caloocan                                                 | -     | 19.23 | 20.11  |

## Supplementary Document 1

### Working History Form

#### *Working History Form*

#### **Working Information**

1. Ilang taon na po kayo nagtatrabaho sa MMDA bilang isang *traffic enforcer*? \_\_\_\_\_
2. Sa anong mga *area* kayo na-assign noong 2016-2018? Gaano katagal kayo sa mga area na ito? Tukuyin pasunod-sunod ang mga *area* na ito simula sa pinaka-unang na-assign sainyo noong 2016.

| <b>Area #</b> | <b>City</b> | <b>Area</b> | <b>Beginning Period</b> | <b>Ending Period</b> |
|---------------|-------------|-------------|-------------------------|----------------------|
|               |             |             |                         |                      |
|               |             |             |                         |                      |
|               |             |             |                         |                      |
|               |             |             |                         |                      |
|               |             |             |                         |                      |

3. Gumagamit ba kayo ng *personal protective equipment* tulad ng mga *face masks* sa trabaho?  Oo  Hindi
  - a. Kung oo, gaano kadalas niyong ginagamit ito? \_\_\_\_\_

## Supplementary Document 2

### Respiratory Health Questionnaire

Code #

Address (City): \_\_\_\_\_

Sex  Male  Female

#### Translated International Primary Airways Guidelines (IPAG) Questionnaire

| Age                                                                                                                                                                                                                                                                                                                                                                                                                                                                                                                                                                                                                                                                                          | Weight | Height | BMI |
|----------------------------------------------------------------------------------------------------------------------------------------------------------------------------------------------------------------------------------------------------------------------------------------------------------------------------------------------------------------------------------------------------------------------------------------------------------------------------------------------------------------------------------------------------------------------------------------------------------------------------------------------------------------------------------------------|--------|--------|-----|
| <b>Smoking History</b>                                                                                                                                                                                                                                                                                                                                                                                                                                                                                                                                                                                                                                                                       |        |        |     |
| 1. Naninigarilyo ba kayo sa kasalukuyan? <input type="checkbox"/> Oo <input type="checkbox"/> Hindi<br>a. Kung oo, ilang <i>stick</i> ng sigarilyo ang nagagamit niyo sa isang araw? _____<br>b. Ilang taon na kayong naninigarilyo? _____                                                                                                                                                                                                                                                                                                                                                                                                                                                   |        |        |     |
| 2. Naninigarilyo ba kayo dati? <input type="checkbox"/> Oo <input type="checkbox"/> Hindi<br>a. Kung oo, ilang <i>stick</i> ng sigarilyo ang nagagamit niyo sa isang araw? _____<br>b. Anong taon po kayong nagsimulang nanigarilyo? _____<br>c. Anong taon po kayong tumigil manigarilyo? _____                                                                                                                                                                                                                                                                                                                                                                                             |        |        |     |
| <b>Past Medical History</b>                                                                                                                                                                                                                                                                                                                                                                                                                                                                                                                                                                                                                                                                  |        |        |     |
| 1. Naapektuhan ba ng panahon ang inyong ubo ( <i>halimbawa: kapag umuulan o kapag mainit</i> )? <input type="checkbox"/> Oo <input type="checkbox"/> Hindi<br>2. Nagkakaroon ba kayo ng plema kahit na wala kayong sipon? <input type="checkbox"/> Oo <input type="checkbox"/> Hindi<br>3. Nagkakaroon ba kayo ng plema pagkagising niyo sa umaga? <input type="checkbox"/> Oo <input type="checkbox"/> Hindi<br>4. Nakakaranas ba kayo ng paghuhuni ( <i>wheezing</i> )? <input type="checkbox"/> Oo, madalas <input type="checkbox"/> Oo, minsan <input type="checkbox"/> Hindi<br>5. Mayroon o nagkaroon ba kayo ng allergies? <input type="checkbox"/> Oo <input type="checkbox"/> Hindi |        |        |     |

#### Additional Questions

|                                                                                                                                                                                                                                                                                                                                                                                                                                                                                                                                                                                                                                                                                                                                                                                                                                                                                                                                                                                                                                                                                            |                                                            |                |                                                            |              |                                                            |                                                    |                                                            |             |                                                            |                                |                                                            |                |                                                            |
|--------------------------------------------------------------------------------------------------------------------------------------------------------------------------------------------------------------------------------------------------------------------------------------------------------------------------------------------------------------------------------------------------------------------------------------------------------------------------------------------------------------------------------------------------------------------------------------------------------------------------------------------------------------------------------------------------------------------------------------------------------------------------------------------------------------------------------------------------------------------------------------------------------------------------------------------------------------------------------------------------------------------------------------------------------------------------------------------|------------------------------------------------------------|----------------|------------------------------------------------------------|--------------|------------------------------------------------------------|----------------------------------------------------|------------------------------------------------------------|-------------|------------------------------------------------------------|--------------------------------|------------------------------------------------------------|----------------|------------------------------------------------------------|
| <b>Respiratory Health</b>                                                                                                                                                                                                                                                                                                                                                                                                                                                                                                                                                                                                                                                                                                                                                                                                                                                                                                                                                                                                                                                                  |                                                            |                |                                                            |              |                                                            |                                                    |                                                            |             |                                                            |                                |                                                            |                |                                                            |
| 1. Nakakaranas ba kayo ng paghihirap sa paghinga? <input type="checkbox"/> Oo <input type="checkbox"/> Hindi<br>2. Madalas po ba kayong nakakaranas ng: <table style="width: 100%; border: none;"> <tr> <td style="width: 80%;">a. Pag-atsing?</td> <td style="text-align: right;"><input type="checkbox"/> Oo <input type="checkbox"/> Hindi</td> </tr> <tr> <td>b. Pagsipon?</td> <td style="text-align: right;"><input type="checkbox"/> Oo <input type="checkbox"/> Hindi</td> </tr> <tr> <td>c. Pantal-pantal, pangangati, o pamumula ng balat?</td> <td style="text-align: right;"><input type="checkbox"/> Oo <input type="checkbox"/> Hindi</td> </tr> <tr> <td>d. Pag-ubo?</td> <td style="text-align: right;"><input type="checkbox"/> Oo <input type="checkbox"/> Hindi</td> </tr> <tr> <td>e. Pagsakit o sikip ng dibdib?</td> <td style="text-align: right;"><input type="checkbox"/> Oo <input type="checkbox"/> Hindi</td> </tr> <tr> <td>f. Paghihinal?</td> <td style="text-align: right;"><input type="checkbox"/> Oo <input type="checkbox"/> Hindi</td> </tr> </table> |                                                            | a. Pag-atsing? | <input type="checkbox"/> Oo <input type="checkbox"/> Hindi | b. Pagsipon? | <input type="checkbox"/> Oo <input type="checkbox"/> Hindi | c. Pantal-pantal, pangangati, o pamumula ng balat? | <input type="checkbox"/> Oo <input type="checkbox"/> Hindi | d. Pag-ubo? | <input type="checkbox"/> Oo <input type="checkbox"/> Hindi | e. Pagsakit o sikip ng dibdib? | <input type="checkbox"/> Oo <input type="checkbox"/> Hindi | f. Paghihinal? | <input type="checkbox"/> Oo <input type="checkbox"/> Hindi |
| a. Pag-atsing?                                                                                                                                                                                                                                                                                                                                                                                                                                                                                                                                                                                                                                                                                                                                                                                                                                                                                                                                                                                                                                                                             | <input type="checkbox"/> Oo <input type="checkbox"/> Hindi |                |                                                            |              |                                                            |                                                    |                                                            |             |                                                            |                                |                                                            |                |                                                            |
| b. Pagsipon?                                                                                                                                                                                                                                                                                                                                                                                                                                                                                                                                                                                                                                                                                                                                                                                                                                                                                                                                                                                                                                                                               | <input type="checkbox"/> Oo <input type="checkbox"/> Hindi |                |                                                            |              |                                                            |                                                    |                                                            |             |                                                            |                                |                                                            |                |                                                            |
| c. Pantal-pantal, pangangati, o pamumula ng balat?                                                                                                                                                                                                                                                                                                                                                                                                                                                                                                                                                                                                                                                                                                                                                                                                                                                                                                                                                                                                                                         | <input type="checkbox"/> Oo <input type="checkbox"/> Hindi |                |                                                            |              |                                                            |                                                    |                                                            |             |                                                            |                                |                                                            |                |                                                            |
| d. Pag-ubo?                                                                                                                                                                                                                                                                                                                                                                                                                                                                                                                                                                                                                                                                                                                                                                                                                                                                                                                                                                                                                                                                                | <input type="checkbox"/> Oo <input type="checkbox"/> Hindi |                |                                                            |              |                                                            |                                                    |                                                            |             |                                                            |                                |                                                            |                |                                                            |
| e. Pagsakit o sikip ng dibdib?                                                                                                                                                                                                                                                                                                                                                                                                                                                                                                                                                                                                                                                                                                                                                                                                                                                                                                                                                                                                                                                             | <input type="checkbox"/> Oo <input type="checkbox"/> Hindi |                |                                                            |              |                                                            |                                                    |                                                            |             |                                                            |                                |                                                            |                |                                                            |
| f. Paghihinal?                                                                                                                                                                                                                                                                                                                                                                                                                                                                                                                                                                                                                                                                                                                                                                                                                                                                                                                                                                                                                                                                             | <input type="checkbox"/> Oo <input type="checkbox"/> Hindi |                |                                                            |              |                                                            |                                                    |                                                            |             |                                                            |                                |                                                            |                |                                                            |
| 3. Meron ba sa pamilya ninyo ang nakakaranas ng mga sintomas na nabanggit sa #2? <input type="checkbox"/> Oo <input type="checkbox"/> Hindi<br>4. Mayroon po ba kayong sakit sa baga sa kasalukuyan (e.g. hika, TB, COPD)? <input type="checkbox"/> Oo <input type="checkbox"/> Hindi<br>a. Nagkaroon po ba kayo ng sakit sa baga dati? <input type="checkbox"/> Oo <input type="checkbox"/> Hindi<br>5. Meron po ba sa pamilya ang may sakit sa baga? <input type="checkbox"/> Mayroon <input type="checkbox"/> Wala                                                                                                                                                                                                                                                                                                                                                                                                                                                                                                                                                                      |                                                            |                |                                                            |              |                                                            |                                                    |                                                            |             |                                                            |                                |                                                            |                |                                                            |
| <b>Indoor Air Pollution Exposure</b>                                                                                                                                                                                                                                                                                                                                                                                                                                                                                                                                                                                                                                                                                                                                                                                                                                                                                                                                                                                                                                                       |                                                            |                |                                                            |              |                                                            |                                                    |                                                            |             |                                                            |                                |                                                            |                |                                                            |
| 1. Saan kayo madalas nagluluto sa bahay? <input type="checkbox"/> Loob ng Bahay <input type="checkbox"/> Labas ng Bahay<br>2. Ano ang ginagamit niyo kapag nagluluto kayo? <input type="checkbox"/> Gas <input type="checkbox"/> Electric <input type="checkbox"/> Uling <input type="checkbox"/> Wood<br>3. Mayroon ba kayong nakabukas na bintana sa kusina para sa bentilasyon? <input type="checkbox"/> Mayroon <input type="checkbox"/> Wala<br>4. Mayroon bang naninigarilyo sa bahay niyo? <input type="checkbox"/> Mayroon <input type="checkbox"/> Wala                                                                                                                                                                                                                                                                                                                                                                                                                                                                                                                           |                                                            |                |                                                            |              |                                                            |                                                    |                                                            |             |                                                            |                                |                                                            |                |                                                            |

## Supplementary Document 3

### Informed Consent (Tagalog Version)

#### Pagbibigay Pahintulot

#### Ambient Air Quality and the Risk for Chronic Obstructive Pulmonary Disease (COPD) among MMDA Traffic Enforcers in Metro Manila: An Exploratory Study

Arcilla, de Guzman, Dizon, Figuracion, Morales, Tugonon  
Ateneo School of Medicine and Public Health

Magandang araw! Kami ay mga estudyante mula sa Ateneo School of Medicine and Public Health. Kayo po ay binigyan ng kasulatan ng pahintulot na ito dahil hinihiling namin na kayo ay sumali sa pagsusuri namin tungkol sa *Chronic Obstructive Pulmonary Disease (COPD)* sa mga MMDA Traffic Enforcers ng Metro Manila. Kayo po ay hinihiling namin na basahin at pirmahan ang kasulatan na ito na nagpapahiwatig ng pagpayag ninyo na sumali sa aming pagsusuri.

#### Layunin ng Pananaliksik

Ang COPD ay isang patuloy na lumalalang sakit sa baga. Kasama dito ang pamamaga at pagsira sa laman ng baga. Ang pagsusuri na ito ay magbibigay ng impormasyon ukol sa panganib ng COPD sa mga MMDA traffic enforcers dahil sa madalas na pagkakalantad sa maduming hangin sa Metro Manila.

Malaki ang tulong nito hindi lamang sa mga *traffic enforcers* pati na rin sa mga ordinaryong mamamayan na nakakaranas din ng polusyon. Bukod dito, maari rin itong makatulong sa MMDA para sa paggawa ng mga patakaran na magbibigay proteksyon laban sa polusyon.

#### Paraan ng Pagsusuri

Bilang isang kalahok sa pagsusuri na ito, sasagot kayo ng isang *questionnaire* at magsasailalim kayo sa isang *Spirometry test*. Ang *spirometry* ay isang pangkaraniwang pamamaraan upang matingnan ang kapasidad ng baga. Bago kayo sumailalim sa test na ito, kami ay magbibigay muna ng demonstrasyon. Ang buong pagsusuri ay tatagal lamang ng 30 minuto at gagawin sa inyong MMDA satellite station.

#### Mga Panganib

Hindi delikado ang *spirometry test* ngunit maaaring makaranas ng paghihinal pagkatapos nito.

#### Mga Gastos o Bayad

Walang gastusin o bayarin sa paglahok sa pagsusuri na ito.

#### Pagiging Kumpidensyal

Lahat ng impormasyon na makukuha mula sa inyo ay kumpidensyal. Hindi lalabas ang pangalan at kahit anong impormasyon na maaring magpakilala sa inyo niyo sa kahit anong *questionnaire*, report at publikasyon ng pagsusuri na ito. Mangyaring may makuhang positibong resulta sa *spirometry test*, hindi kami ang sasagot ng pagpapagamot, ngunit maaaring hingin namin ang inyong pangalan at *contact number* para i-refer sa nararapat na doktor.

#### Karapatang Tumanggi

Ang ivong partisipasyon ay boluntaryo. Maaari niyong pliin na hindi sumali sa pagsusuri na ito. Pwede rin kayong umalis kahit anong oras kung hindi na kayo kumportable sa proseso.

#### Mga Taong Dapat Kailangan

Para sa mga katanungan ukol sa pagsusuri at sa karapatan ninyo, maaari niyong kontakin si Audrey Lynn Arcilla (09459838486 / audreyarcilla@ateneo.obf.edu)

#### Sertipiko ng Pagbibigay Pahintulot

Ako ay pumapayag na maging parte ng pagsusuri na gagawin ng mga mananaliksik upang magbigay ng impormasyon na magagamit sa saliksik ukol sa *Air Quality and risk of COPD among MMDA traffic enforcers*. Ito ay gagawin sa petsang \_\_\_\_\_ at tatagal ng 30 minuto.

Binibigay ko ang aking pahintulot na maging parte ng saliksik na ito. Ako ay pumapayag na:

1. Sagutan ang *questionnaire* at interview ng makatotohanan, at
2. Sumailalim sa *Spirometry test*.

Ipinagtitiwala ko na ang impormasyong ibibigay ko ay gagamitin lamang sa saliksik na ito. Lahat ng personal na impormasyong ibibigay ko ay kompidensyal at hindi mailalabas. Naiintindihan ko na may karapatan akong umalis kahit kailan sa pagsusuri na ito ng walang kahit na ano mang banta sa pamamagitan ng pagsabi sa mga nagsusuri na nasa *site*.

\_\_\_\_\_

Lagda ng respondent

\_\_\_\_\_

Petsa

\_\_\_\_\_

Pangalan at lagda ng estudyante

\_\_\_\_\_

Petsa
